# Supplementary material for: Associations between Adherence to Four A Priori Dietary Indexes and Cardiometabolic Risk Factors among Hyperlipidemic Patients
Source: MDPI journal article supplement (doi:10.3390/nu13072179), 2021-06-24

**Figure S1-Online Supplementary Figure. Flow diagram of recruitment and screening for participants with hyperlipidemia.**

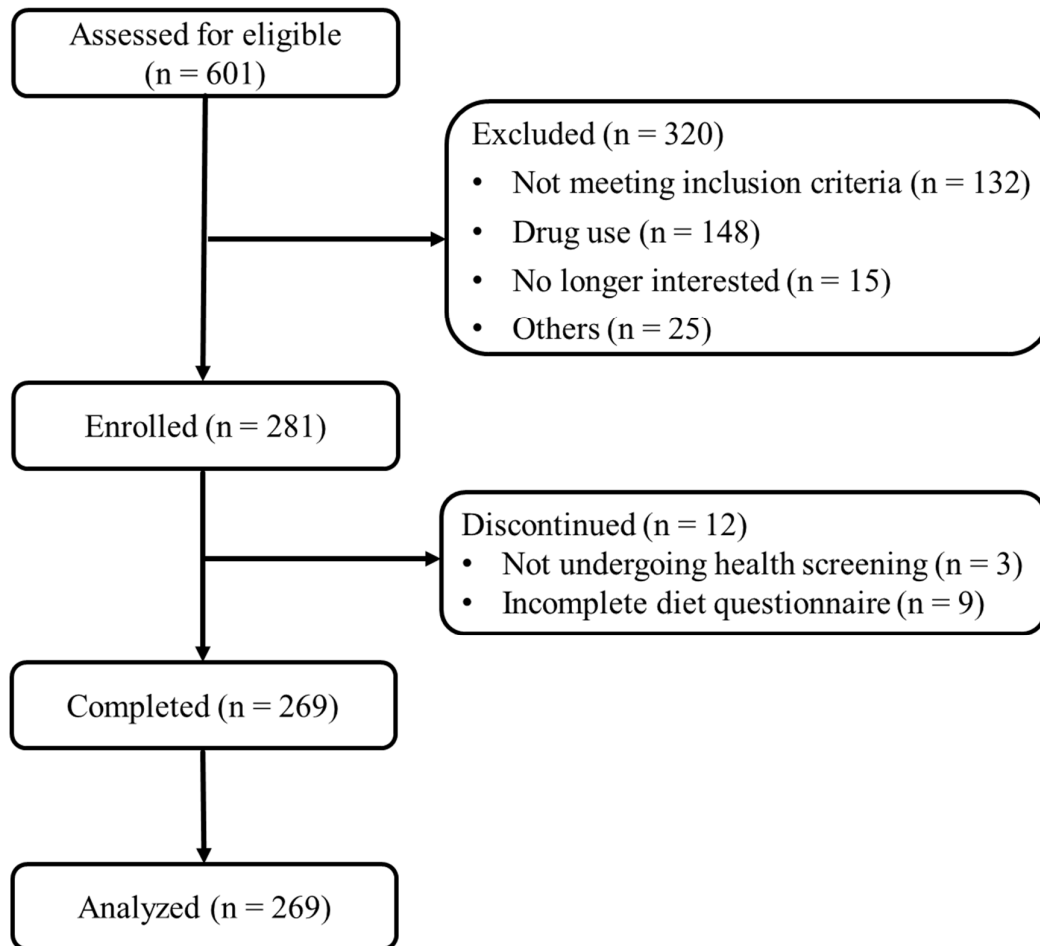

Supplement: s1 [file s1]
