# Supplementary material for: Associations between Adherence to Four A Priori Dietary Indexes and Cardiometabolic Risk Factors among Hyperlipidemic Patients
Source: MDPI journal article supplement (doi:10.3390/nu13072179), 2021-06-24
Supplement: s1 [file s1]

|                   |                    |                                                  |           | Score decreased<br>1 with intake<br>amount<br>decreased 1g<br>0g=-6 | Score decreased 1 with intake amount decreased 3g<br>0g=-6 |           |           |            | Score decreased 1 with intake amount decreased 5g<br>0g=-6 |  |
|-------------------|--------------------|--------------------------------------------------|-----------|---------------------------------------------------------------------|------------------------------------------------------------|-----------|-----------|------------|------------------------------------------------------------|--|
| C4-Animal<br>food | (-12)-8            | Red meat and<br>products,<br>Poultry and<br>game | (-4)-4    | 0g=-3                                                               | 0g=-4                                                      | 0g=-4     | 0g=-4     | 0g=-4      | 0g=-4                                                      |  |
|                   |                    |                                                  |           | 1-5g=-2                                                             | 1-5g=-3                                                    | 1-10g=-3  | 1-15g=-3  | 1-20g=-3   | 1-25g=-3                                                   |  |
|                   |                    |                                                  |           | 6-10g=-1                                                            | 6-10g=-2                                                   | 11-20g=-2 | 16-30g=-2 | 21-40g=-2  | 26-50g=-2                                                  |  |
|                   |                    |                                                  |           | 11-20g=0                                                            | 11-15g=-1                                                  | 21-30g=-1 | 31-45g=-1 | 41-60g=-3  | 51-75g=-1                                                  |  |
|                   |                    |                                                  |           | 21-25g=1                                                            | 16-35g=0                                                   | 31-50g=0  | 46-55g=0  | 61-90g=0   | 76-125g=0                                                  |  |
|                   |                    |                                                  |           | 26-30g=2                                                            | 36-40g=1                                                   | 51-60g=1  | 56-70g=1  | 91-110g=1  | 126-150g=1                                                 |  |
|                   |                    |                                                  |           | 31-35g=3                                                            | 41-45g=2                                                   | 61-70g=2  | 71-85g=2  | 111-130g=2 | 151-175g=2                                                 |  |
|                   |                    |                                                  |           | >35g=4                                                              | 46-50g=3                                                   | 71-80g=-3 | 85-100g=3 | 131-150g=3 | 176-200g=3                                                 |  |
|                   |                    | >50g =4                                          | >80g =4   | >100g =4                                                            | >150g=4                                                    | >200g=4   |           |            |                                                            |  |
|                   | Fish and<br>Shrimp | (-4)-0                                           | 0g=-4     | <5g=-4                                                              | <10g=-4                                                    | <5g=-4    | 0g=-4     | <25g=-4    | <50g=-4                                                    |  |
|                   |                    |                                                  | 1-4g=-3   | 5-9g=-3                                                             | 10-19g=-3                                                  | 5-19g=-3  | 1-24g=-3  | 25-49g=-3  | 50-74g=-3                                                  |  |
|                   |                    |                                                  | 5-9g=-2   | 10-14g=-2                                                           | 20-29g=-2                                                  | 20-34g=-2 | 25-49g=-2 | 50-74g=-2  | 75-99g=-2                                                  |  |
|                   |                    |                                                  | 10-14g=-1 | 15-19g=-1                                                           | 30-39g=-1                                                  | 35-49g=-1 | 50-74g=-1 | 75-99g=-1  | 100-124g=-1                                                |  |
|                   |                    |                                                  | ≥15g=0    | ≥20g=0                                                              | ≥40g=0                                                     | ≥50g=0    | ≥75g=0    | ≥100g=0    | ≥125g=0                                                    |  |
|                   | Egg                | (-4)-4                                           | 0g=-4     | <5g=-4                                                              | 0g=-4                                                      | 0g=-4     |           |            |                                                            |  |
|                   |                    |                                                  | 1-5g=-3   | 6-10g=-3                                                            | 1-10g=-3                                                   | 1-15g=-3  |           |            |                                                            |  |
|                   |                    |                                                  | 6-10g=-2  | 11-15g=-2                                                           | 11-20g=-2                                                  | 16-30g=-2 |           |            |                                                            |  |
|                   |                    |                                                  | 11-15g=-1 | 16-20g=-1                                                           | 21-30g=-1                                                  | 31-45g=-1 |           |            |                                                            |  |
|                   |                    |                                                  | 16-25g=0  | 21-30g=0                                                            | 31-50g=0                                                   | 46-55g=0  |           |            |                                                            |  |
|                   |                    |                                                  | 26-30g=1  | 31-35g=1                                                            | 51-60g=1                                                   | 56-70g=1  |           |            |                                                            |  |

|                      |         |                    |         |                                                                                                                                                                                                                                                                                                                                             |                                      |                                                |                                                   |          |          |
|----------------------|---------|--------------------|---------|---------------------------------------------------------------------------------------------------------------------------------------------------------------------------------------------------------------------------------------------------------------------------------------------------------------------------------------------|--------------------------------------|------------------------------------------------|---------------------------------------------------|----------|----------|
|                      |         |                    |         | 31-35g=2                                                                                                                                                                                                                                                                                                                                    | 36-40g=2                             | 61-70g=2                                       | 71-85g=2                                          |          |          |
|                      |         |                    |         | 36-40g=3                                                                                                                                                                                                                                                                                                                                    | 41-45g=3                             | 71-80g=-3                                      | 85-100g=3                                         |          |          |
|                      |         |                    |         | >40g=4                                                                                                                                                                                                                                                                                                                                      | >45g =4                              | >80g =4                                        | >100g =4                                          |          |          |
| C5-Empty energy food | 0-12    | Cooking oil        | 0-6     | ≤20g=0                                                                                                                                                                                                                                                                                                                                      | ≤25g=0                               |                                                |                                                   | ≤30g=0   | ≤35g=0   |
|                      |         |                    |         | 21-25g=1                                                                                                                                                                                                                                                                                                                                    | 26-30g=1                             |                                                |                                                   | 31-35g=1 | 36-40g=1 |
|                      |         |                    |         | >45g=6                                                                                                                                                                                                                                                                                                                                      | >50g=6                               |                                                |                                                   | >55g=6   | >60g=6   |
|                      |         | Alcoholic beverage | 0-6     | Male: ≤ 25g=0; 26-40g=1; score increased 1 with intake amount increased 15g; >100g=6<br>(25g alcohol=750ml beer or 250ml wine or 75g liquor 38°or 50g liquor > 38°)<br>Female: ≤15g=0; 16-25g=1; score increased 1 with intake amount increased 10g; >65g=6<br>(15g alcohol=450ml beer or 150ml wine or 50g liquor 38° or 30g liquor > 38°) |                                      |                                                |                                                   |          |          |
| C6-Condiments        | 0-12    | Addible sugar      | 0-6     | ≤25g=0; 26g=1; score increased 1 with intake amount increased 5g; >50g=6                                                                                                                                                                                                                                                                    |                                      |                                                |                                                   |          |          |
|                      |         | Salt               | 0-6     | <2g=0                                                                                                                                                                                                                                                                                                                                       | <3g=0                                | <4g=0                                          | <6g=0                                             |          |          |
|                      |         |                    |         | 2-3g=1                                                                                                                                                                                                                                                                                                                                      | 3-4g=1                               | 4-5g=1                                         | 6-7g=1                                            |          |          |
|                      |         |                    |         | Score increased 1 with intake amount increased 2g                                                                                                                                                                                                                                                                                           | score increased 1 with intake amount | Score increased 1 with intake amount increased | score increased 1 with intake amount increased 2g |          |          |
|                      |         |                    |         | 2g                                                                                                                                                                                                                                                                                                                                          | increased 2g                         | 2g                                             |                                                   |          |          |
|                      |         |                    |         | >12g=6                                                                                                                                                                                                                                                                                                                                      | >13g=6                               | 14g=6                                          |                                                   |          |          |
| C7-Diet variety      | (-12)-0 | Diet variety       | (-12)-0 | ≥12 kinds of food (soybean is 5g) =0; score decreased 1 with decreased 1 kinds of food                                                                                                                                                                                                                                                      |                                      |                                                |                                                   |          |          |
| C8-Drinking water    | (-12)-0 | Drinking water     | (-12)-0 | ≥1200ml=0; score decreased 1 with intake amount decreased 100ml; <100ml=-12                                                                                                                                                                                                                                                                 |                                      |                                                |                                                   |          |          |

<sup>1</sup>This table has been reproduced from He, Y., et al., *Update of the Chinese diet balance index: DBI-16*. Acta Nutrimenta Sinica, 2018. 40(06): p. 526-530.

**Supplementary Table S2. CHEI components and standard for scoring<sup>1</sup>.**

| Component                    | Score                  |                                                                                      |                                |
|------------------------------|------------------------|--------------------------------------------------------------------------------------|--------------------------------|
|                              | 0                      | 5                                                                                    | 10                             |
| <b>Adequacy</b>              |                        |                                                                                      |                                |
| Total Grains                 | 0                      |    | ≥2.5 SP/1000 kcal <sup>2</sup> |
| Whole Grains and Mixed Beans | 0                      |    | ≥0.6 SP/1000 kcal              |
| Tubers                       | 0                      |    | ≥0.3 SP/1000 kcal              |
| Total Vegetables             | 0                      |    | ≥1.9 SP/1000 kcal              |
| Dark Vegetables              | 0                      |    | ≥0.9 SP/1000 kcal              |
| Fruits                       | 0                      |    | ≥1.1 SP/1000 kcal              |
| Dairy                        | 0                      |    | ≥0.5 SP/1000 kcal              |
| Soybeans                     | 0                      |    | ≥0.4 SP/1000 kcal              |
| Fish and Seafood             | 0                      |    | ≥0.6 SP/1000 kcal              |
| Poultry                      | 0                      |    | ≥0.3 SP/1000 kcal              |
| Eggs                         | 0                      |    | ≥0.5 SP/1000 kcal              |
| Seeds and Nuts               | 0                      |    | ≥0.4 SP/1000 kcal              |
| <b>Limitation</b>            |                        |                                                                                      |                                |
| Red Meat                     | ≥3.5                   |  | ≤0.4 SP/1000 kcal              |
| Cooking Oils                 | ≥32.6                  |  | ≤15.6 g/1000 kcal              |
| Sodium                       | ≥3608                  |  | ≤1000 mg/1000kcal              |
| Added Sugars                 | ≥20%                   |  | ≤10% of energy <sup>3</sup>    |
| Alcohol                      | ≤60g (men)/40g (women) |                                                                                      | ≤60g (men)/40g (women)         |

<sup>1</sup>This table has been reproduced from Yuan, Y.Q., et al., *The Development of a Chinese Healthy Eating Index and Its Application in the General Population*. Nutrients, 2017. 9(9).

<sup>2</sup>SP/1000 kcal: Standard Portion per 1000 kcal

<sup>3</sup>% of energy: percentage of energy

**Supplementary Table S3. MDS components and standard for scoring<sup>1</sup>.**

| <b>Food group</b>                         | <b>Criteria for 1 point</b>             |
|-------------------------------------------|-----------------------------------------|
| Vegetables                                | Greater than median intake (servings/d) |
| Legumes                                   | Greater than median intake (servings/d) |
| Fruit                                     | Greater than median intake (servings/d) |
| Nuts                                      | Greater than median intake (servings/d) |
| Whole grains                              | Greater than median intake (servings/d) |
| Red and processed meats                   | less than median intake (servings/d)    |
| Fish                                      | Greater than median intake (servings/d) |
| Ratio of monounsaturated to saturated fat | Greater than median intake (servings/d) |
| Ethanol                                   | 5-25 g/d                                |

<sup>1</sup>This table has been reproduced from Fung, T.T., et al., *Diet-quality scores and plasma concentrations of markers of inflammation and endothelial dysfunction*. Am J Clin Nutr, 2005. 82(1): p. 163-73.

**Supplementary Table S4. DASH score components and standard for scoring<sup>1</sup>.**

| <b>Component</b>          | <b>Maximum score</b> | <b>Standard for maximum score</b> | <b>Standard for minimum score</b> |
|---------------------------|----------------------|-----------------------------------|-----------------------------------|
| Grains                    |                      |                                   |                                   |
| Total                     | 5                    | ≥6 servings/d                     | 0 servings/d                      |
| High fiber                | 5                    | ≥50% of daily servings            | 0% of daily servings              |
| Vegetables                | 10                   | ≥4 servings/d                     | 0 servings/d                      |
| Fruit                     | 10                   | ≥4 servings/d                     | 0 servings/d                      |
| Dairy                     |                      |                                   |                                   |
| Total                     | 5                    | ≥2 servings/d                     | 0 servings/d                      |
| Low fat                   | 5                    | ≥75% of daily servings            | 0% of daily servings              |
| Meat, poultry, fish, eggs | 10                   | ≤2 servings/d                     | ≥4 servings/d                     |
| Nuts, seeds, legumes      | 10                   | ≥4 servings/week                  | 0 servings/week                   |
| Fats, oils                | 10                   | ≤3 servings/d                     | ≥6 servings/d                     |
| Sweets                    | 10                   | ≤5 servings/week                  | ≥10 servings/week                 |

<sup>1</sup>This table has been reproduced from Danielewicz, A., et al., Association of the Dietary Approaches to Stop Hypertension, Physical Activity, and Their Combination with Semen Quality: A Cross-Sectional Study. Nutrients, 2019. 12(1).

**Supplementary Table S5. Associations between DBI-16 scores and cardiometabolic risk factors among 202 female participants with hyperlipidemia <sup>1,2</sup>.**

| Cardiometabolic<br>risk factors | DBI-TS                       |                | DBI-LBS                      |                | DBI-HBS                      |                | DQD                          |                |
|---------------------------------|------------------------------|----------------|------------------------------|----------------|------------------------------|----------------|------------------------------|----------------|
|                                 | $\beta$ coefficient (95% CI) | R <sup>2</sup> |
| Lipid and lipoprotein profiles  |                              |                |                              |                |                              |                |                              |                |
| Triglyceride                    |                              |                |                              |                |                              |                |                              |                |
| Model 1                         | -0.010 (-0.030, 0.010)       | 4.6%           | 0.017 (-0.008, 0.043)        | 5.0%           | 0.001 (-0.035, 0.038)        | 4.1%           | 0.030 (-0.018, 0.078)        | 4.8%           |
| Model 2                         | -0.014 (-0.033, 0.006)       | 6.5%           | 0.017 (-0.009, 0.043)        | 6.4%           | -0.015 (-0.056, 0.026)       | 5.9%           | -0.014 (-0.033, 0.005)       | 5.8%           |
| TC                              |                              |                |                              |                |                              |                |                              |                |
| Model 1                         | 0.011 (-0.003, 0.025)        | 13.1%          | -0.006 (-0.024, 0.013)       | 12.2%          | 0.025 (0, 0.051)             | 13.7%          | 0.038 (0.004, 0.072)*        | 14.1%          |
| Model 2                         | 0.012 (-0.003, 0.026)        | 15.4%          | -0.009 (-0.027, 0.010)       | 14.7%          | 0.027 (-0.002, 0.056)        | 15.7%          | 0.043 (0.002, 0.083)*        | 16.1%          |
| LDL-C                           |                              |                |                              |                |                              |                |                              |                |
| Model 1                         | 0.007 (-0.009, 0.022)        | 8.1%           | -0.001 (-0.021, 0.019)       | 7.8%           | 0.020 (-0.008, 0.049)        | 8.7%           | 0.040 (0.003, 0.078)*        | 9.7%           |
| Model 2                         | 0.008 (-0.008, 0.024)        | 9.9%           | -0.003 (-0.023, 0.018)       | 9.5%           | 0.027 (-0.005, 0.059)        | 10.7%          | 0.055 (0.011, 0.100)*        | 12.1%          |
| HDL-C                           |                              |                |                              |                |                              |                |                              |                |
| Model 1                         | 0.008 (0.001, 0.014)*        | 16.8%          | -0.011 (-0.019, -0.003)*     | 17.6%          | 0.003 (-0.009, 0.014)        | 14.5%          | -0.018 (-0.033, -0.003)*     | 16.6%          |
| Model 2                         | 0.008 (0.002, 0.014)*        | 19.2%          | -0.012 (-0.020, -0.004)*     | 20.0%          | 0.005 (-0.008, 0.017)        | 16.7%          | -0.024 (-0.042, -0.006)*     | 19.3%          |
| TC : HDL-C ratio                |                              |                |                              |                |                              |                |                              |                |
| Model 1                         | -0.015 (-0.033, 0.003)       | 7.6%           | 0.028 (0.005, 0.051)*        | 8.9%           | 0.006 (-0.027, 0.039)        | 6.4%           | 0.066 (0.023, 0.110)*        | 10.3%          |
| Model 2                         | -0.017 (-0.035, 0.001)       | 8.4%           | 0.028 (0.004, 0.052)*        | 9.3%           | -0.001 (-0.039, 0.036)       | 6.9%           | 0.080 (0.029, 0.132)*        | 10.9%          |
| LDL-C : HDL-C ratio             |                              |                |                              |                |                              |                |                              |                |
| Model 1                         | -0.010 (-0.024, 0.003)       | 7.1%           | 0.021 (0.004, 0.038)*        | 8.7%           | 0.009 (-0.016, 0.033)        | 6.3%           | 0.058 (0.026, 0.090)*        | 11.6%          |
| Model 2                         | -0.010 (-0.024, 0.004)       | 7.2%           | 0.021 (0.003, 0.039)*        | 8.8%           | 0.010 (-0.018, 0.039)        | 6.6%           | 0.080 (0.042, 0.118)*        | 13.6%          |
| ApoA1                           |                              |                |                              |                |                              |                |                              |                |
| Model 1                         | 0.004 (0, 0.008)*            | 10.3%          | -0.005 (-0.010, -0.001)*     | 10.4%          | 0.003 (-0.004, 0.010)        | 8.5%           | -0.008 (-0.017, 0.001)       | 9.5%           |
| Model 2                         | 0.005 (0.001, 0.008)*        | 13.1%          | -0.006 (-0.011, -0.001)*     | 13.5%          | 0.003 (-0.004, 0.011)        | 11.0%          | -0.013 (-0.024, -0.002)*     | 13.2%          |

|                                |                        |       |                        |       |                        |       |                          |       |
|--------------------------------|------------------------|-------|------------------------|-------|------------------------|-------|--------------------------|-------|
| ApoB                           |                        |       |                        |       |                        |       |                          |       |
| Model 1                        | 0.001 (-0.003, 0.005)  | 7.9%  | 0.002 (-0.004, 0.007)  | 8.1%  | 0.006 (-0.002, 0.013)  | 9.0%  | 0.016 (0.007, 0.026)*    | 12.8% |
| Model 2                        | 0.001 (-0.003, 0.005)  | 9.5%  | 0.001 (-0.004, 0.006)  | 9.5%  | 0.005 (-0.003, 0.014)  | 10.2% | 0.019 (0.008, 0.030)*    | 14.2% |
| ApoA1 : ApoB ratio             |                        |       |                        |       |                        |       |                          |       |
| Model 1                        | 0 (-0.005, 0.006)      | 4.8%  | -0.003 (-0.010, 0.004) | 5.1%  | -0.005 (-0.016, 0.005) | 5.3%  | -0.024 (-0.037, -0.011)* | 10.5% |
| Model 2                        | 0.001 (-0.005, 0.007)  | 5.1%  | -0.003 (-0.010, 0.004) | 5.4%  | -0.005 (-0.016, 0.007) | 5.4%  | -0.031 (-0.046, -0.015)* | 11.5% |
| Glucose homeostasis biomarkers |                        |       |                        |       |                        |       |                          |       |
| Glucose                        |                        |       |                        |       |                        |       |                          |       |
| Model 1                        | -0.002 (-0.018, 0.015) | 7.9%  | 0.012 (-0.009, 0.033)  | 8.4%  | 0.019 (-0.011, 0.049)  | 8.5%  | 0.044 (0.005, 0.084)*    | 10.0% |
| Model 2                        | -0.002 (-0.018, 0.015) | 9.0%  | 0.008 (-0.013, 0.030)  | 9.3%  | 0.014 (-0.020, 0.048)  | 9.3%  | 0.043 (-0.004, 0.091)    | 10.4% |
| HbA1c                          |                        |       |                        |       |                        |       |                          |       |
| Model 1                        | 0.002 (-0.009, 0.013)  | 6.1%  | 0.004 (-0.010, 0.018)  | 6.2%  | 0.014 (-0.006, 0.034)  | 6.9%  | 0.031 (0.005, 0.058)*    | 8.4%  |
| Model 2                        | 0.002 (-0.009, 0.013)  | 8.8%  | 0 (-0.014, 0.014)      | 8.8%  | 0.007 (-0.016, 0.029)  | 8.9%  | 0.022 (-0.009, 0.054)    | 9.6%  |
| Blood pressure                 |                        |       |                        |       |                        |       |                          |       |
| Systolic blood pressure        |                        |       |                        |       |                        |       |                          |       |
| Model 1                        | -0.090 (-0.330, 0.149) | 15.6% | 0.064 (-0.243, 0.371)  | 15.5% | -0.171 (-0.607, 0.265) | 15.6% | -0.330 (-0.911, 0.251)   | 15.9% |
| Model 2                        | -0.062 (-0.303, 0.179) | 17.3% | 0.098 (-0.215, 0.412)  | 17.3% | -0.016 (-0.508, 0.476) | 17.2% | -0.152 (-0.842, 0.538)   | 17.3% |
| Diastolic blood pressure       |                        |       |                        |       |                        |       |                          |       |
| Model 1                        | 0.008 (-0.136, 0.151)  | 12.0% | -0.093 (-0.277, 0.091) | 12.4% | -0.163 (-0.425, 0.098) | 12.6% | -0.226 (-0.574, 0.123)   | 12.7% |
| Model 2                        | 0.020 (-0.124, 0.164)  | 14.7% | -0.061 (-0.249, 0.126) | 14.8% | -0.066 (-0.361, 0.228) | 14.7% | -0.074 (-0.487, 0.339)   | 14.7% |

<sup>1</sup> Data are presented as  $\beta$  coefficients (95% CI) per 1 SD of the DBI-16 score. TC, total cholesterol; LDL-C, low density lipoprotein cholesterol; HDL-C, high density lipoprotein; HbA1c, glycated hemoglobin A1c; Apo, apolipoprotein.

<sup>2</sup> Associations between the DBI-16 scores and cardiometabolic risk factors were analyzed using multivariable linear regression models. In model 1, the data were adjusted for potential confounders, including age, sex, BMI. Model 2 included model 1 plus additional sociodemographic and lifestyle confounders, including cigarette smoking, education status, physical activity and total energy intake. \* $P < 0.05$ .

**Supplementary Table S6. Associations between DBI-16 scores and cardiometabolic risk factors among 67 male participants with hyperlipidemia <sup>1,2</sup>.**

| Cardiometabolic<br>risk factors | DBI-TS                       |                | DBI-LBS                      |                | DBI-HBS                      |                | DQD                          |                |
|---------------------------------|------------------------------|----------------|------------------------------|----------------|------------------------------|----------------|------------------------------|----------------|
|                                 | $\beta$ coefficient (95% CI) | R <sup>2</sup> |
| Lipid and lipoprotein profiles  |                              |                |                              |                |                              |                |                              |                |
| Triglyceride                    |                              |                |                              |                |                              |                |                              |                |
| Model 1                         | -0.052 (-0.098, -0.007)*     | 26.0%          | 0.051 (-0.002, 0.105)        | 24.4%          | -0.041 (-0.121, 0.040)       | 21.5%          | -0.072 (-0.186, 0.042)       | 22.2%          |
| Model 2                         | -0.056 (-0.101, -0.011)*     | 34.0%          | 0.062 (0.011, 0.114)*        | 33.6%          | -0.029 (-0.114, 0.055)       | 28.5%          | -0.039 (-0.168, 0.089)       | 28.4%          |
| TC                              |                              |                |                              |                |                              |                |                              |                |
| Model 1                         | 0.019 (-0.011, 0.049)        | 2.7%           | -0.019 (-0.054, 0.015)       | 2.1%           | 0.014 (-0.038, 0.065)        | 0.8%           | 0.018 (-0.055, 0.092)        | 0.8%           |
| Model 2                         | 0.013 (-0.016, 0.042)        | 14.0%          | -0.009 (-0.043, 0.024)       | 13.4%          | 0.019 (-0.034, 0.072)        | 13.7%          | 0.040 (-0.040, 0.120)        | 14.3%          |
| LDL-C                           |                              |                |                              |                |                              |                |                              |                |
| Model 1                         | 0.027 (-0.004, 0.057)        | 8.1%           | -0.028 (-0.064, 0.008)       | 7.3%           | 0.018 (-0.036, 0.072)        | 4.7%           | 0.040 (-0.036, 0.117)        | 5.6%           |
| Model 2                         | 0.022 (-0.009, 0.053)        | 14.9%          | -0.021 (-0.056, 0.015)       | 14.0%          | 0.022 (-0.035, 0.078)        | 13.1%          | 0.055 (-0.030, 0.141)        | 14.4%          |
| HDL-C                           |                              |                |                              |                |                              |                |                              |                |
| Model 1                         | 0.016 (0.005, 0.026)*        | 27.7%          | -0.014 (-0.026, -0.001)*     | 23.5%          | 0.017 (-0.002, 0.036)        | 22.1%          | 0.005 (-0.023, 0.032)        | 18.7%          |
| Model 2                         | 0.016 (0.006, 0.027)*        | 29.7%          | -0.015 (-0.028, -0.002)*     | 26.1%          | 0.017 (-0.003, 0.038)        | 23.7%          | 0 (-0.032, 0.032)            | 20.5%          |
| TC : HDL-C ratio                |                              |                |                              |                |                              |                |                              |                |
| Model 1                         | -0.033 (-0.065, -0.002)*     | 28.1%          | 0.032 (-0.004, 0.068)        | 26.5%          | -0.029 (-0.083, 0.026)       | 24.5%          | -0.001 (-0.080, 0.077)       | 23.3%          |
| Model 2                         | -0.044 (-0.072, -0.015)*     | 42.8%          | 0.045 (0.012, 0.079)*        | 41.4%          | -0.031 (-0.086, 0.024)       | 36.5%          | 0.022 (-0.062, 0.106)        | 35.6%          |
| LDL-C : HDL-C ratio             |                              |                |                              |                |                              |                |                              |                |
| Model 1                         | -0.007 (-0.032, 0.018)       | 9.2%           | 0.009 (-0.020, 0.038)        | 9.2%           | -0.003 (-0.045, 0.040)       | 8.8%           | 0.033 (-0.028, 0.093)        | 10.3%          |
| Model 2                         | -0.014 (-0.038, 0.010)       | 20.2%          | 0.017 (-0.011, 0.044)        | 20.3%          | -0.004 (-0.049, 0.040)       | 18.8%          | 0.045 (-0.022, 0.112)        | 20.8%          |
| ApoA1                           |                              |                |                              |                |                              |                |                              |                |
| Model 1                         | 0.007 (0.001, 0.014)*        | 21.7%          | -0.006 (-0.014, 0.002)       | 18.5%          | 0.009 (-0.002, 0.020)        | 18.7%          | 0 (-0.017, 0.016)            | 15.7%          |
| Model 2                         | 0.008 (0.001, 0.015)*        | 23.6%          | -0.007 (-0.015, 0.001)       | 20.6%          | 0.010 (-0.003, 0.022)        | 20.1%          | -0.003 (-0.022, 0.017)       | 17.3%          |



|                                |                        |       |                        |       |                        |       |                        |       |
|--------------------------------|------------------------|-------|------------------------|-------|------------------------|-------|------------------------|-------|
| ApoB                           |                        |       |                        |       |                        |       |                        |       |
| Model 1                        | 0.005 (-0.002, 0.013)  | 5.9%  | -0.005 (-0.013, 0.003) | 4.9%  | 0.005 (-0.008, 0.017)  | 3.6%  | 0.008 (-0.010, 0.026)  | 4.0%  |
| Model 2                        | 0.004 (-0.003, 0.011)  | 18.3% | -0.003 (-0.011, 0.005) | 17.3% | 0.006 (-0.006, 0.019)  | 17.9% | 0.013 (-0.006, 0.032)  | 19.0% |
| ApoA1 : ApoB ratio             |                        |       |                        |       |                        |       |                        |       |
| Model 1                        | 0.001 (-0.007, 0.010)  | 15.7% | -0.001 (-0.011, 0.09)  | 15.6% | 0.003 (-0.012, 0.018)  | 15.7% | -0.009 (-0.029, 0.012) | 16.4% |
| Model 2                        | 0.003 (-0.005, 0.011)  | 25.9% | -0.003 (-0.013, 0.006) | 25.8% | 0.002 (-0.013, 0.017)  | 25.5% | -0.015 (-0.038, 0.008) | 27.3% |
| Glucose homeostasis biomarkers |                        |       |                        |       |                        |       |                        |       |
| Glucose                        |                        |       |                        |       |                        |       |                        |       |
| Model 1                        | 0.045 (0.014, 0.076)*  | 15.2% | -0.029 (-0.067, 0.008) | 8.0%  | 0.069 (0.016, 0.123)*  | 13.1% | -0.033 (-0.113, 0.047) | 5.7%  |
| Model 2                        | 0.045 (0.014, 0.077)*  | 19.0% | -0.028 (-0.065, 0.010) | 12.2% | 0.080 (0.022, 0.137)*  | 18.5% | -0.031 (-0.123, 0.060) | 10.0% |
| HbA1c                          |                        |       |                        |       |                        |       |                        |       |
| Model 1                        | 0.014 (-0.006, 0.034)  | 12.7% | -0.006 (-0.029, 0.018) | 10.6% | 0.028 (-0.005, 0.062)  | 13.8% | -0.010 (-0.059, 0.039) | 10.5% |
| Model 2                        | 0.013 (-0.007, 0.033)  | 20.0% | -0.002 (-0.025, 0.021) | 18.0% | 0.038 (0.003, 0.073)*  | 23.2% | 0.011 (-0.044, 0.066)  | 18.2% |
| Blood pressure                 |                        |       |                        |       |                        |       |                        |       |
| Systolic blood pressure        |                        |       |                        |       |                        |       |                        |       |
| Model 1                        | 0.125 (-0.346, 0.595)  | 13.5% | -0.128 (-0.673, 0.418) | 13.5% | 0.087 (-0.722, 0.895)  | 13.3% | -0.607 (-1.750, 0.535) | 14.6% |
| Model 2                        | 0.109 (-0.364, 0.582)  | 18.8% | -0.059 (-0.604, 0.486) | 18.6% | 0.213 (-0.648, 1.074)  | 18.8% | -0.411 (-1.716, 0.894) | 19.0% |
| Diastolic blood pressure       |                        |       |                        |       |                        |       |                        |       |
| Model 1                        | -0.012 (-0.299, 0.275) | 15.1% | -0.054 (-0.386, 0.279) | 15.2% | -0.153 (-0.644, 0.337) | 15.6% | -0.263 (-0.961, 0.435) | 15.8% |
| Model 2                        | 0.021 (-0.270, 0.311)  | 19.3% | -0.046 (-0.380, 0.288) | 19.4% | 0.046 (-0.574, 0.482)  | 19.3% | -0.025 (-0.827, 0.777) | 19.3% |

<sup>1</sup> Data are presented as  $\beta$  coefficients (95% CI) per 1 SD of the DBI-16 score. TC, total cholesterol; LDL-c, low density lipoprotein cholesterol; HDL-c, high density lipoprotein; HbA1c, glycated hemoglobin A1c; Apo, apolipoprotein.

<sup>2</sup> Associations between the DBI-16 scores and cardiometabolic risk factors were analyzed using multivariable linear regression models. In model 1, the data were adjusted for potential confounders, including age, sex, BMI. Model 2 included model 1 plus additional sociodemographic and lifestyle confounders, including cigarette smoking, education status, physical activity and total energy intake. \* $P < 0.05$ .

**Supplementary Table S7. Associations between CHEI, MDS and DASH scores and cardiometabolic risk factors among 202 female participants with hyperlipidemia <sup>1,2</sup>.**

| Cardiometabolic risk factors   | CHEI                         |                | MDS                          |                | DASH scores                  |                |
|--------------------------------|------------------------------|----------------|------------------------------|----------------|------------------------------|----------------|
|                                | $\beta$ coefficient (95% CI) | R <sup>2</sup> | $\beta$ coefficient (95% CI) | R <sup>2</sup> | $\beta$ coefficient (95% CI) | R <sup>2</sup> |
| Lipid and lipoprotein profiles |                              |                |                              |                |                              |                |
| Triglyceride                   |                              |                |                              |                |                              |                |
| Model 1                        | -0.012 (-0.030, 0.007)       | 4.8%           | -0.034 (-0.191, 0.123)       | 4.2%           | -0.012 (-0.034, 0.009)       | 4.7%           |
| Model 2                        | -0.014 (-0.033, 0.005)       | 6.7%           | 0.007 (-0.160, 0.174)        | 5.7%           | -0.013 (-0.034, 0.009)       | 6.3%           |
| TC                             |                              |                |                              |                |                              |                |
| Model 1                        | -0.004 (-0.018, 0.010)       | 12.2%          | 0.099 (-0.013, 0.211)        | 13.4%          | 0.005 (-0.011, 0.020)        | 12.2%          |
| Model 2                        | -0.003 (-0.016, 0.011)       | 14.4%          | 0.134 (0.016, 0.252)         | 16.4%          | 0.007 (-0.009, 0.022)        | 14.7%          |
| LDL-C                          |                              |                |                              |                |                              |                |
| Model 1                        | -0.004 (-0.018, 0.011)       | 7.9%           | 0.084 (-0.038, 0.207)        | 8.6%           | 0.004 (-0.013, 0.021)        | 7.8%           |
| Model 2                        | -0.002 (-0.017, 0.013)       | 9.5%           | 0.099 (-0.031, 0.229)        | 10.5%          | 0.005 (-0.012, 0.022)        | 9.7%           |
| HDL-C                          |                              |                |                              |                |                              |                |
| Model 1                        | 0.003 (-0.003, 0.009)        | 14.8%          | 0.027 (-0.022, 0.076)        | 14.9%          | 0.005 (-0.002, 0.011)        | 15.1%          |
| Model 2                        | 0.004 (-0.002, 0.010)        | 17.1%          | 0.029 (-0.024, 0.081)        | 17.0%          | 0.005 (-0.002, 0.012)        | 17.4%          |
| TC : HDL-C ratio               |                              |                |                              |                |                              |                |
| Model 1                        | -0.012 (-0.029, 0.006)       | 7.2%           | 0.011 (-0.134, 0.155)        | 6.4%           | -0.016 (-0.036, 0.004)       | 7.5%           |
| Model 2                        | -0.013 (-0.031, 0.004)       | 7.8%           | 0.038 (-0.117, 0.193)        | 7.0%           | -0.016 (-0.036, 0.004)       | 8.0%           |
| LDL-C : HDL-C ratio            |                              |                |                              |                |                              |                |
| Model 1                        | -0.007 (-0.020, 0.006)       | 6.7%           | 0.018 (-0.089, 0.126)        | 6.1%           | -0.008 (-0.023, 0.007)       | 6.6%           |
| Model 2                        | -0.007 (-0.020, 0.006)       | 6.8%           | 0.025 (-0.090, 0.140)        | 6.4%           | -0.008 (-0.023, 0.007)       | 6.8%           |
| ApoA1                          |                              |                |                              |                |                              |                |
| Model 1                        | 0 (-0.003, 0.004)            | 8.2%           | 0.007 (-0.023, 0.037)        | 8.3%           | 0.002 (-0.002, 0.006)        | 8.6%           |
| Model 2                        | 0.001 (-0.003, 0.004)        | 10.8%          | 0.010 (-0.022, 0.042)        | 10.9%          | 0.003 (-0.001, 0.007)        | 11.4%          |

|                                |                        |       |                         |       |                        |       |
|--------------------------------|------------------------|-------|-------------------------|-------|------------------------|-------|
| ApoB                           |                        |       |                         |       |                        |       |
| Model 1                        | -0.001 (-0.006, 0.003) | 8.1%  | 0.016 (-0.017, 0.049)   | 8.2%  | -0.001 (-0.005, 0.004) | 8.0%  |
| Model 2                        | -0.001 (-0.005, 0.003) | 9.6%  | 0.022 (-0.012, 0.055)   | 10.2% | 0 (-0.005, 0.004)      | 9.5%  |
| ApoA1 : ApoB ratio             |                        |       |                         |       |                        |       |
| Model 1                        | -0.001 (-0.006, 0.005) | 4.8%  | -0.006 (-0.051, 0.038)  | 4.8%  | 0.001 (-0.005, 0.007)  | 4.8%  |
| Model 2                        | -0.001 (-0.006, 0.005) | 5.1%  | -0.014 (-0.062, 0.033)  | 5.3%  | 0.001 (-0.005, 0.007)  | 5.1%  |
| Glucose homeostasis biomarkers |                        |       |                         |       |                        |       |
| Glucose                        |                        |       |                         |       |                        |       |
| Model 1                        | -0.007 (-0.022, 0.009) | 8.1%  | -0.132 (-0.261, -0.002) | 9.6%  | -0.015 (-0.033, 0.003) | 9.1%  |
| Model 2                        | -0.006 (-0.022, 0.010) | 9.2%  | -0.118 (-0.257, 0.020)  | 10.3% | -0.014 (-0.032, 0.004) | 10.0% |
| HbA1c                          |                        |       |                         |       |                        |       |
| Model 1                        | -0.002 (-0.013, 0.008) | 6.1%  | -0.102 (-0.188, 0.016)  | 8.5%  | -0.008 (-0.020, 0.004) | 6.9%  |
| Model 2                        | -0.001 (-0.012, 0.009) | 8.8%  | -0.081 (-0.173, 0.011)  | 10.1% | -0.007 (-0.019, 0.005) | 9.3%  |
| Blood pressure                 |                        |       |                         |       |                        |       |
| Systolic blood pressure        |                        |       |                         |       |                        |       |
| Model 1                        | -0.056 (-0.285, 0.172) | 15.5% | 0.707 (-1.188, 2.602)   | 15.6% | -0.147 (-0.409, 0.115) | 15.9% |
| Model 2                        | -0.034 (-0.264, 0.197) | 17.2% | 0.247 (-1.765, 2.260)   | 17.2% | -0.143 (-0.404, 0.118) | 17.7% |
| Diastolic blood pressure       |                        |       |                         |       |                        |       |
| Model 1                        | 0.040 (-0.097, 0.178)  | 12.1% | 0.556 (-0.581, 1.694)   | 12.4% | 0.021 (-0.137, 0.179)  | 12.0% |
| Model 2                        | 0.047 (-0.091, 0.184)  | 14.8% | 0.218 (-0.985, 1.422)   | 14.7% | 0.021 (-0.136, 0.178)  | 14.7% |

<sup>1</sup> Data are presented as  $\beta$  coefficients (95% CI) per 1 SD of the CHEI, MDS, DASH score. TC, total cholesterol; LDL-c, low density lipoprotein cholesterol; HDL-c, high density lipoprotein; HbA1c, glycated hemoglobin A1c; Apo, apolipoprotein.

<sup>2</sup> Associations between the CHEI, MDS, DASH scores and cardiometabolic risk factors were analyzed using multivariable linear regression models. In model 1, the data were adjusted for potential confounders, including age, sex, BMI. Model 2 included model 1 plus additional sociodemographic and lifestyle confounders, including cigarette smoking, education status, physical activity and total energy intake. \* $P < 0.05$ .

**Supplementary Table S8. Associations between CHEI, MDS and DASH scores and cardiometabolic risk factors among 67 male participants with hyperlipidemia <sup>1,2</sup>.**

| Cardiometabolic risk factors   | CHEI                         |                | MDS                          |                | DASH scores                  |                |
|--------------------------------|------------------------------|----------------|------------------------------|----------------|------------------------------|----------------|
|                                | $\beta$ coefficient (95% CI) | R <sup>2</sup> | $\beta$ coefficient (95% CI) | R <sup>2</sup> | $\beta$ coefficient (95% CI) | R <sup>2</sup> |
| Lipid and lipoprotein profiles |                              |                |                              |                |                              |                |
| Triglyceride                   |                              |                |                              |                |                              |                |
| Model 1                        | -0.021 (-0.056, 0.014)       | 22.0%          | 0.054 (-0.254, 0.362)        | 20.5%          | -0.014 (-0.067, 0.039)       | 20.7%          |
| Model 2                        | -0.026 (-0.062, 0.011)       | 30.0%          | 0.101 (-0.206, 0.408)        | 28.5%          | -0.002 (-0.057, 0.053)       | 28.0%          |
| TC                             |                              |                |                              |                |                              |                |
| Model 1                        | 0.020 (-0.002, 0.043)        | 5.0%           | -0.156 (-0.349, 0.036)       | 4.0%           | -0.001 (-0.035, 0.033)       | 0.4%           |
| Model 2                        | 0.011 (-0.012, 0.034)        | 14.2%          | -0.134 (-0.325, 0.056)       | 15.5%          | -0.006 (-0.040, 0.029)       | 13.2%          |
| LDL-C                          |                              |                |                              |                |                              |                |
| Model 1                        | 0.025 (0.002, 0.048)*        | 10.0%          | -0.168 (-0.369, 0.033)       | 7.8%           | 0.001 (-0.035, 0.036)        | 4.1%           |
| Model 2                        | 0.016 (-0.008, 0.041)        | 14.5%          | -0.170 (-0.371, 0.032)       | 15.7%          | -0.009 (-0.045, 0.028)       | 12.6%          |
| HDL-C                          |                              |                |                              |                |                              |                |
| Model 1                        | 0.004 (-0.005, 0.012)        | 19.3%          | -0.015 (-0.088, 0.059)       | 18.7%          | -0.001 (-0.013, 0.012)       | 18.6%          |
| Model 2                        | 0.004 (-0.005, 0.013)        | 21.4%          | -0.016 (-0.093, 0.060)       | 20.7%          | -0.002 (-0.016, 0.011)       | 20.6%          |
| TC : HDL-C ratio               |                              |                |                              |                |                              |                |
| Model 1                        | -0.001 (-0.025, 0.023)       | 23.3%          | -0.126 (-0.333, 0.081)       | 24.9%          | -0.009 (-0.045, 0.027)       | 23.5%          |
| Model 2                        | -0.012 (-0.037, 0.012)       | 36.3%          | -0.083 (-0.283, 0.118)       | 35.9%          | -0.006 (-0.042, 0.030)       | 35.4%          |
| LDL-C : HDL-C ratio            |                              |                |                              |                |                              |                |
| Model 1                        | 0.008 (-0.011, 0.027)        | 9.8%           | -0.159 (-0.318, 0)*          | 13.7%          | -0.006 (-0.034, 0.023)       | 9.0%           |
| Model 2                        | -0.001 (-0.021, 0.018)       | 18.7%          | -0.153 (-0.310, 0.005)       | 22.9%          | -0.011 (-0.039, 0.018)       | 19.4%          |
| ApoA1                          |                              |                |                              |                |                              |                |
| Model 1                        | 0.001 (-0.004, 0.006)        | 15.9%          | 0.015 (-0.029, 0.059)        | 16.3%          | 0.002 (-0.006, 0.009)        | 16.0%          |
| Model 2                        | 0.002 (-0.004, 0.007)        | 17.8%          | 0.017 (-0.028, 0.063)        | 17.9%          | 0.002 (-0.006, 0.010)        | 17.5%          |

|                                |                        |       |                        |       |                        |       |
|--------------------------------|------------------------|-------|------------------------|-------|------------------------|-------|
| ApoB                           |                        |       |                        |       |                        |       |
| Model 1                        | 0.006 (0.001, 0.011)*  | 9.6%  | -0.037 (-0.084, 0.010) | 6.3%  | 0.001 (-0.007, 0.009)  | 3.0%  |
| Model 2                        | 0.004 (-0.002, 0.009)  | 18.8% | -0.034 (-0.080, 0.011) | 19.3% | 0 (-0.009, 0.008)      | 16.8% |
| ApoA1 : ApoB ratio             |                        |       |                        |       |                        |       |
| Model 1                        | -0.004 (-0.011, 0.002) | 17.7% | 0.044 (-0.011, 0.099)  | 18.5% | 0.001 (-0.009, 0.010)  | 15.6% |
| Model 2                        | -0.002 (-0.009, 0.005) | 25.7% | 0.042 (-0.013, 0.096)  | 27.8% | 0.002 (-0.008, 0.011)  | 25.5% |
| Glucose homeostasis biomarkers |                        |       |                        |       |                        |       |
| Glucose                        |                        |       |                        |       |                        |       |
| Model 1                        | 0.005 (-0.020, 0.030)  | 5.0%  | 0.012 (-0.202, 0.226)  | 4.8%  | -0.026 (-0.062, 0.010) | 7.5%  |
| Model 2                        | 0.008 (-0.019, 0.034)  | 9.9%  | 0.073 (-0.146, 0.292)  | 10.0% | -0.018 (-0.057, 0.021) | 10.6% |
| HbA1c                          |                        |       |                        |       |                        |       |
| Model 1                        | -0.003 (-0.018, 0.012) | 10.5% | -0.051 (-0.181, 0.080) | 11.0% | -0.013 (-0.036, 0.009) | 12.1% |
| Model 2                        | -0.002 (-0.018, 0.014) | 18.1% | -0.016 (-0.148, 0.116) | 18.1% | -0.009 (-0.032, 0.015) | 18.7% |
| Blood pressure                 |                        |       |                        |       |                        |       |
| Systolic blood pressure        |                        |       |                        |       |                        |       |
| Model 1                        | -0.121 (-0.475, 0.233) | 13.8% | -1.246 (-4.306, 1.814) | 14.0% | -0.124 (-0.652, 0.405) | 13.5% |
| Model 2                        | -0.166 (-0.542, 0.209) | 19.4% | -0.859 (-3.981, 2.263) | 18.9% | -0.023 (-0.582, 0.535) | 18.5% |
| Diastolic blood pressure       |                        |       |                        |       |                        |       |
| Model 1                        | -0.016 (-0.233, 0.200) | 15.1% | -0.111 (-1.982, 1.760) | 15.1% | 0.128 (-0.193, 0.449)  | 15.9% |
| Model 2                        | 0.020 (-0.211, 0.251)  | 19.3% | -0.111 (-2.027, 1.806) | 19.3% | 0.216 (-0.122, 0.554)  | 21.1% |

<sup>1</sup> Data are presented as  $\beta$  coefficients (95% CI) per 1 SD of the CHEI, MDS, DASH score. TC, total cholesterol; LDL-c, low density lipoprotein cholesterol; HDL-c, high density lipoprotein; HbA1c, glycated hemoglobin A1c; Apo, apolipoprotein.

<sup>2</sup> Associations between the CHEI, MDS, DASH scores and cardiometabolic risk factors were analyzed using multivariable linear regression models. In model 1, the data were adjusted for potential confounders, including age, sex, BMI. Model 2 included model 1 plus additional sociodemographic and lifestyle confounders, including cigarette smoking, education status, physical activity and total energy intake. \* $P < 0.05$ .

**Supplementary Table S9. Associations between DBI-16 scores and cardiometabolic risk factors among 269 Chinese participants with hyperlipidemia <sup>1,2</sup>.**

| Cardiometabolic risk factors   | DBI-TS                |                       | DBI-LBS               |                       | DBI-HBS               |                       | DQD                   |                       |
|--------------------------------|-----------------------|-----------------------|-----------------------|-----------------------|-----------------------|-----------------------|-----------------------|-----------------------|
|                                | adjusted OR (95% CI)  | Pseudo R <sup>2</sup> | adjusted OR (95% CI)  | Pseudo R <sup>2</sup> | adjusted OR (95% CI)  | Pseudo R <sup>2</sup> | adjusted OR (95% CI)  | Pseudo R <sup>2</sup> |
| Lipid and lipoprotein profiles |                       |                       |                       |                       |                       |                       |                       |                       |
| Triglyceride                   |                       |                       |                       |                       |                       |                       |                       |                       |
| Model 1                        | 0.965 (0.936,0.995)*  | <u>18.6%</u>          | 1.052 (1.013,1.094)*  | <u>19.2%</u>          | 0.989 (0.937,1.043)   | <u>16.3%</u>          | 1.063 (0.986,1.146)   | <u>17.4%</u>          |
| Model 2                        | 0.965 (0.934,0.997)*  | <u>26.3%</u>          | 1.053 (1.011,1.097)*  | <u>27.0%</u>          | 0.99 (0.927,1.057)    | <u>24.5%</u>          | 1.098 (0.996,1.21)    | <u>25.9%</u>          |
| TC                             |                       |                       |                       |                       |                       |                       |                       |                       |
| Model 1                        | 1.032 (1.001,1.063) * | <u>12.5%</u>          | 0.964 (0.929,1.000)   | <u>12.3%</u>          | 1.025 (0.972,1.08)    | <u>11.0%</u>          | 1.034 (0.962,1.11)    | <u>11.0%</u>          |
| Model 2                        | 1.040 (1.008,1.073) * | <u>17.5%</u>          | 0.958 (0.921,0.996) * | <u>16.8%</u>          | 1.051 (0.988,1.119)   | <u>15.8%</u>          | 1.067 (0.976,1.166)   | <u>15.6%</u>          |
| LDL-C                          |                       |                       |                       |                       |                       |                       |                       |                       |
| Model 1                        | 1.030 (1.000,1.061) * | <u>9.2%</u>           | 0.962 (0.927,0.998) * | <u>9.3%</u>           | 1.016 (0.965,1.071)   | <u>7.5%</u>           | 1.037 (0.967,1.113)   | <u>7.8%</u>           |
| Model 2                        | 1.035 (1.004,1.067) * | <u>13.3%</u>          | 0.961 (0.925,0.999) * | <u>12.9%</u>          | 1.041 (0.979,1.107)   | <u>11.7%</u>          | 1.091 (0.998,1.191)   | <u>12.7%</u>          |
| HDL-C                          |                       |                       |                       |                       |                       |                       |                       |                       |
| Model 1                        | 1.044 (1.011,1.077)*  | <u>26.0%</u>          | 0.958 (0.921,0.997) * | <u>24.9%</u>          | 1.052 (0.995,1.113)   | <u>24.3%</u>          | 0.961 (0.892,1.037)   | <u>23.5%</u>          |
| Model 2                        | 1.044 (1.010,1.079)*  | <u>28.3%</u>          | 0.956 (0.918,0.996) * | <u>27.5%</u>          | 1.061 (0.993,1.133)   | <u>26.8%</u>          | 0.929 (0.844,1.022)   | <u>26.5%</u>          |
| TC : HDL-C ratio               |                       |                       |                       |                       |                       |                       |                       |                       |
| Model 1                        | 0.955 (0.926,0.985)*  | <u>16.4%</u>          | 1.068 (1.027,1.110)*  | <u>17.5%</u>          | 0.985 (0.934,1.038)   | <u>12.5%</u>          | 1.153 (1.065,1.248) * | <u>18.4%</u>          |
| Model 2                        | 0.948 (0.918,0.979)*  | <u>24.1%</u>          | 1.069 (1.026,1.113)*  | <u>24.0%</u>          | 0.956 (0.897,1.018)   | <u>20.4%</u>          | 1.192 (1.079,1.316) * | <u>25.0%</u>          |
| LDL-C: HDL-C ratio             |                       |                       |                       |                       |                       |                       |                       |                       |
| Model 1                        | 0.972 (0.944,1.001)   | <u>10.4%</u>          | 1.040 (1.002,1.079) * | <u>10.7%</u>          | 0.987 (0.937,1.04)    | <u>8.8%</u>           | 1.095 (1.017,1.178) * | <u>11.5%</u>          |
| Model 2                        | 0.971 (0.941,1.001)   | <u>13.7%</u>          | 1.038 (0.999,1.079)   | <u>13.7%</u>          | 0.975 (0.917,1.036)   | <u>12.3%</u>          | 1.128 (1.029,1.236) * | <u>15.1%</u>          |
| ApoA1                          |                       |                       |                       |                       |                       |                       |                       |                       |
| Model 1                        | 1.050 (1.017,1.084)*  | <u>28.1%</u>          | 0.952 (0.915,0.991)*  | <u>26.8%</u>          | 1.058 (1.000,1.119) * | <u>26.0%</u>          | 0.950 (0.880,1.025)   | <u>25.1%</u>          |

|                                |                       |              |                       |              |                       |              |                       |              |
|--------------------------------|-----------------------|--------------|-----------------------|--------------|-----------------------|--------------|-----------------------|--------------|
| Model 2                        | 1.052 (1.018,1.088) * | <u>29.5%</u> | 0.948 (0.909,0.988) * | <u>28.4%</u> | 1.073 (1.004,1.146) * | <u>27.5%</u> | 0.911 (0.827,1.004)   | <u>27.2%</u> |
| ApoB                           |                       |              |                       |              |                       |              |                       |              |
| Model 1                        | 1.017 (0.988,1.047)   | <u>4.0%</u>  | 0.988 (0.954,1.025)   | <u>3.5%</u>  | 1.031 (0.979,1.087)   | <u>4.0%</u>  | 1.070 (0.996,1.149)   | <u>5.0%</u>  |
| Model 2                        | 1.020 (0.990,1.051)   | <u>7.5%</u>  | 0.988 (0.951,1.025)   | <u>6.9%</u>  | 1.051 (0.989,1.117)   | <u>7.9%</u>  | 1.123 (1.028,1.228) * | <u>9.9%</u>  |
| ApoA1 : ApoB ratio             |                       |              |                       |              |                       |              |                       |              |
| Model 1                        | 1.034 (1.004,1.064) * | <u>10.2%</u> | 0.954 (0.919,0.990) * | <u>10.9%</u> | 1.01 (0.958,1.064)    | <u>8.0%</u>  | 0.889 (0.824,0.959) * | <u>12.4%</u> |
| Model 2                        | 1.037 (1.005,1.070) * | <u>16.8%</u> | 0.956 (0.920,0.994) * | <u>16.6%</u> | 1.034 (0.972,1.100)   | <u>14.9%</u> | 0.872 (0.793,0.958) * | <u>18.1%</u> |
| Glucose homeostasis biomarkers |                       |              |                       |              |                       |              |                       |              |
| Glucose                        |                       |              |                       |              |                       |              |                       |              |
| Model 1                        | 1.028 (0.998,1.059)   | <u>10.8%</u> | 0.979 (0.943,1.015)   | <u>9.8%</u>  | 1.046 (0.991,1.103)   | <u>10.4%</u> | 1.029 (0.958,1.105)   | <u>9.5%</u>  |
| Model 2                        | 1.029 (0.998,1.061)   | <u>13.4%</u> | 0.974 (0.938,1.012)   | <u>12.7%</u> | 1.051 (0.987,1.118)   | <u>13.0%</u> | 1.024 (0.938,1.119)   | <u>12.0%</u> |
| HbA1c                          |                       |              |                       |              |                       |              |                       |              |
| Model 1                        | 0.995 (0.966,1.024)   | <u>7.0%</u>  | 1.021 (0.985,1.059)   | <u>7.6%</u>  | 1.028 (0.976,1.084)   | <u>7.5%</u>  | 1.092 (1.015,1.175) * | <u>9.6%</u>  |
| Model 2                        | 0.991 (0.962,1.022)   | <u>12.7%</u> | 1.015 (0.977,1.055)   | <u>12.9%</u> | 1.005 (0.945,1.068)   | <u>12.6%</u> | 1.081 (0.988,1.182)   | <u>13.9%</u> |
| Blood pressure                 |                       |              |                       |              |                       |              |                       |              |
| Systolic blood pressure        |                       |              |                       |              |                       |              |                       |              |
| Model 1                        | 0.977 (0.948,1.007)   | <u>21.5%</u> | 1.014 (0.976,1.054)   | <u>20.8%</u> | 0.954 (0.903,1.008)   | <u>21.7%</u> | 0.915 (0.848,0.987)   | <u>22.8%</u> |
| Model 2                        | 0.975 (0.945,1.007)   | <u>23.6%</u> | 1.019 (0.979,1.060)   | <u>23.0%</u> | 0.946 (0.887,1.009)   | <u>23.8%</u> | 0.889 (0.810,0.976)   | <u>25.2%</u> |
| Diastolic blood pressure       |                       |              |                       |              |                       |              |                       |              |
| Model 1                        | 0.988 (0.958,1.018)   | <u>18.8%</u> | 1.008 (0.970,1.047)   | <u>18.6%</u> | 0.977 (0.925,1.031)   | <u>18.8%</u> | 0.968 (0.899,1.042)   | <u>18.8%</u> |
| Model 2                        | 0.987 (0.956,1.019)   | <u>25.0%</u> | 1.016 (0.976,1.058)   | <u>25.0%</u> | 0.988 (0.926,1.054)   | <u>24.8%</u> | 0.990 (0.903,1.085)   | <u>24.8%</u> |

<sup>1</sup> Data are presented as adjusted OR (95% CI) per 1 SD of the DBI-16 score. TC, total cholesterol; LDL-c, low density lipoprotein cholesterol; HDL-c, high density lipoprotein; HbA1c, glycated hemoglobin A1c; Apo, apolipoprotein.

<sup>2</sup> Associations between the DBI-16 scores and cardiometabolic risk factors were analyzed using logistic regression models. In model 1, the data were adjusted for potential confounders, including age, sex, BMI. Model 2 included model 1 plus additional sociodemographic and lifestyle confounders, including cigarette smoking, education status,

physical activity and total energy intake. \* $P < 0.05$ .

**Supplementary Table S10. Associations between CHEI, MDS and DASH scores and cardiometabolic risk factors among 269 Chinese participants with hyperlipidemia <sup>1,2</sup>.**

| Cardiometabolic risk factors   | CHEI                  |                       | MDS                   |                       | DASH scores          |                       |
|--------------------------------|-----------------------|-----------------------|-----------------------|-----------------------|----------------------|-----------------------|
|                                | adjusted OR (95% CI)  | Pseudo R <sup>2</sup> | adjusted OR (95% CI)  | Pseudo R <sup>2</sup> | adjusted OR (95% CI) | Pseudo R <sup>2</sup> |
| Lipid and lipoprotein profiles |                       |                       |                       |                       |                      |                       |
| Triglyceride                   |                       |                       |                       |                       |                      |                       |
| Model 1                        | 0.987 (0.96,1.014)    | <u>16.7%</u>          | 1.023 (0.812,1.288)   | <u>16.3%</u>          | 1.002 (0.971,1.036)  | <u>16.3%</u>          |
| Model 2                        | 0.980 (0.952,1.009)   | <u>25.2%</u>          | 0.973 (0.754,1.257)   | <u>24.4%</u>          | 0.998 (0.965,1.033)  | <u>24.4%</u>          |
| TC                             |                       |                       |                       |                       |                      |                       |
| Model 1                        | 1.016 (0.989,1.044)   | <u>11.2%</u>          | 1.292 (1.024,1.629) * | <u>12.8%</u>          | 1.028 (0.995,1.062)  | <u>11.9%</u>          |
| Model 2                        | 1.021 (0.993,1.05)    | <u>15.7%</u>          | 1.309 (1.017,1.684) * | <u>16.7%</u>          | 1.027 (0.993,1.062)  | <u>15.8%</u>          |
| LDL-C                          |                       |                       |                       |                       |                      |                       |
| Model 1                        | 1.023 (0.996,1.051)   | <u>8.7%</u>           | 1.286 (1.023,1.615) * | <u>9.6%</u>           | 1.008 (0.976,1.040)  | <u>7.4%</u>           |
| Model 2                        | 1.030 (1.002,1.059) * | <u>13.1%</u>          | 1.298 (1.018,1.656) * | <u>13.0%</u>          | 1.007 (0.975,1.040)  | <u>11.1%</u>          |
| HDL-C                          |                       |                       |                       |                       |                      |                       |
| Model 1                        | 1.004 (0.976,1.033)   | <u>23.1%</u>          | 1.020 (0.802,1.296)   | <u>23.0%</u>          | 0.987 (0.954,1.021)  | <u>5149.0%</u>        |
| Model 2                        | 1.007 (0.978,1.037)   | <u>25.7%</u>          | 1.060 (0.817,1.376)   | <u>25.7%</u>          | 0.989 (0.956,1.024)  | <u>25.7%</u>          |
| TC: HDL-C ratio                |                       |                       |                       |                       |                      |                       |
| Model 1                        | 0.990 (0.963,1.017)   | <u>12.7%</u>          | 1.009 (0.804,1.265)   | <u>12.4%</u>          | 1.007 (0.975,1.040)  | <u>12.5%</u>          |
| Model 2                        | 0.987 (0.959,1.015)   | <u>20.0%</u>          | 1.068 (0.832,1.371)   | <u>19.7%</u>          | 1.005 (0.972,1.039)  | <u>19.6%</u>          |
| LDL-C: HDL-C ratio             |                       |                       |                       |                       |                      |                       |
| Model 1                        | 0.996 (0.970,1.022)   | <u>8.8%</u>           | 1.004 (0.803,1.254)   | <u>8.7%</u>           | 1.009 (0.978,1.042)  | <u>8.9%</u>           |
| Model 2                        | 0.997 (0.970,1.025)   | <u>12.0%</u>          | 1.032 (0.811,1.314)   | <u>12.0%</u>          | 1.008 (0.975,1.041)  | <u>12.1%</u>          |



|                                |                     |              |                       |              |                     |              |
|--------------------------------|---------------------|--------------|-----------------------|--------------|---------------------|--------------|
| <hr/>                          |                     |              |                       |              |                     |              |
| ApoA1                          |                     |              |                       |              |                     |              |
| Model 1                        | 1.003 (0.975,1.032) | <u>24.4%</u> | 1.026 (0.806,1.306)   | <u>24.4%</u> | 1.008 (0.974,1.042) | <u>24.5%</u> |
| Model 2                        | 1.005 (0.976,1.034) | <u>25.8%</u> | 1.045 (0.807,1.353)   | <u>25.8%</u> | 1.009 (0.975,1.044) | <u>25.9%</u> |
| ApoB                           |                     |              |                       |              |                     |              |
| Model 1                        | 1.014 (0.988,1.04)  | <u>3.8%</u>  | 1.061 (0.854,1.319)   | <u>3.5%</u>  | 1.009 (0.978,1.041) | <u>3.5%</u>  |
| Model 2                        | 1.018 (0.991,1.046) | <u>7.4%</u>  | 1.074 (0.849,1.358)   | <u>6.8%</u>  | 1.009 (0.977,1.042) | <u>6.8%</u>  |
| ApoA1 : ApoB ratio             |                     |              |                       |              |                     |              |
| Model 1                        | 1.002 (0.976,1.029) | <u>7.9%</u>  | 1.002 (0.802,1.251)   | <u>7.9%</u>  | 1.002 (0.971,1.034) | <u>7.9%</u>  |
| Model 2                        | 1.001 (0.974,1.029) | <u>14.4%</u> | 0.959 (0.751,1.224)   | <u>14.4%</u> | 1.005 (0.973,1.039) | <u>14.4%</u> |
| Glucose homeostasis biomarkers |                     |              |                       |              |                     |              |
| Glucose                        |                     |              |                       |              |                     |              |
| Model 1                        | 1.011 (0.984,1.038) | <u>9.5%</u>  | 0.855 (0.682,1.071)   | <u>10.1%</u> | 0.979 (0.947,1.011) | <u>10.0%</u> |
| Model 2                        | 1.014 (0.987,1.042) | <u>12.3%</u> | 0.864 (0.678,1.100)   | <u>12.5%</u> | 0.979 (0.948,1.012) | <u>12.6%</u> |
| HbA1c                          |                     |              |                       |              |                     |              |
| Model 1                        | 1.002 (0.977,1.029) | <u>7.0%</u>  | 0.716 (0.569,0.902) * | <u>10.9%</u> | 0.980 (0.949,1.012) | <u>7.7%</u>  |
| Model 2                        | 1.007 (0.980,1.035) | <u>12.7%</u> | 0.746 (0.582,0.956) * | <u>15.1%</u> | 0.982 (0.95,1.015)  | <u>13.1%</u> |
| Blood pressure                 |                     |              |                       |              |                     |              |
| Systolic blood pressure        |                     |              |                       |              |                     |              |
| Model 1                        | 0.979 (0.951,1.007) | <u>21.5%</u> | 1.059 (0.837,1.341)   | <u>20.6%</u> | 0.980 (0.947,1.013) | <u>21.2%</u> |
| Model 2                        | 0.974 (0.946,1.004) | <u>23.9%</u> | 1.057 (0.820,1.361)   | <u>22.7%</u> | 0.978 (0.945,1.013) | <u>23.3%</u> |
| Diastolic blood pressure       |                     |              |                       |              |                     |              |
| Model 1                        | 0.981 (0.955,1.009) | <u>19.3%</u> | 0.968 (0.766,1.223)   | <u>18.5%</u> | 0.984 (0.952,1.017) | <u>18.9%</u> |
| Model 2                        | 0.983 (0.955,1.012) | <u>25.3%</u> | 0.916 (0.706,1.189)   | <u>24.9%</u> | 0.980 (0.946,1.016) | <u>25.2%</u> |
| <hr/>                          |                     |              |                       |              |                     |              |

<sup>1</sup> Data are presented as adjusted OR (95% CI) per 1 SD of the CHEI, MDS, DASH score. TC, total cholesterol; LDL-c, low density lipoprotein cholesterol; HDL-c, high density lipoprotein; HbA1c, glycated hemoglobin A1c; Apo, apolipoprotein.

<sup>2</sup> Associations between the CHEI, MDS, DASH scores and cardiometabolic risk factors were analyzed using logistic regression models. In model 1, the data were adjusted for potential confounders, including age, sex, BMI. Model 2 included model 1 plus additional sociodemographic and lifestyle confounders, including cigarette smoking, education status, physical activity and total energy intake. \* $P < 0.05$ .
